# Supplementary material for: NRF2 polymorphism and susceptibility to ischemic stroke in a Chinese population
Source: PeerJ. 2025 Jul 24;13:e19742. doi: 10.7717/peerj.19742 (PMC12296571; doi:10.7717/peerj.19742)
Supplement: Supplemental Information 2 [file peerj-13-19742-s002.xlsx]

## Sheet: Sheet1
Sample Type	Group	rs4893819	rs13005431	rs2706110	rs2364723	rs6726395	rs35652124	rs6721961
		[C/T]	[C/T]	[C/T]	[C/G]	[A/G]	[C/T]	[G/T]
DNA	Control	CT	CT	CT	CG	AG	CT	GT
DNA	Control	CT	CC	CC	CG	GG	CT	GT
DNA	Control	TT	CC	CC	CG	GG	CC	GG
DNA	Control	TT	CT	CT	CG	AG	CC	GG
DNA	Control	TT	CT	CC	CC	AG	CC	GG
DNA	Control	CC	TT	TT	GG	AA	TT	TT
DNA	Control	CT	CT	CC	CG	AG	CT	GT
DNA	Control	CT	CT	CT	CG	AG	CT	GG
DNA	Control	TT	CC	CC	CC	GG	CC	GT
DNA	Control	TT	CC	CC	CC	GG	CC	GG
DNA	Control	TT	CC	CC	CG	GG	CC	GG
DNA	Control	TT	CC	CC	CG	GG	CC	GG
DNA	Control	TT	CT	CT	CC	AG	CC	GG
DNA	Control	CT	CT	CC	CG	AG	CT	GG
DNA	Control	CC	TT	CT	GG	AA	TT	GT
DNA	Control	TT	CC	CC	CC	GG	CC	GG
DNA	Control	CT	CT	CT	CG	AG	CT	GT
DNA	Control	CT	CT	CT	CG	AG	CT	GT
DNA	Control	TT	CC	CC	CC	GG	CC	GG
DNA	Control	CT	TT	CT	CG	AA	CT	GT
DNA	Control	TT	CC	CC	CG	GG	CT	GG
DNA	Control	CC	TT	TT	GG	AA	TT	TT
DNA	Control	CT	CT	CC	CG	AG	CT	GG
DNA	Control	TT	CC	CC	CC	GG	CC	GG
DNA	Control	CT	CT	CC	CG	AG	CC	GG
DNA	Control	TT	CC	CC	CC	GG	CC	GG
DNA	Control	CT	CT	CC	CG	AG	CT	GG
DNA	Control	CC	CT	CC	GG	AG	TT	TT
DNA	Control	TT	CC	CC	CG	GG	CC	GG
DNA	Control	CT	CT	CT	CG	AG	CT	GT
DNA	Control	CC	TT	TT	GG	AA	TT	TT
DNA	Control	CT	CT	CT	CG	AG	CT	GT
DNA	Control	TT	CT	CC	CC	AG	CC	GG
DNA	Control	CT	CT	CC	GG	AG	TT	GG
DNA	Control	CT	CT	CC	CG	AG	CT	GT
DNA	Control	CT	CT	CC	CG	AG	CT	GG
DNA	Control	CT	CC	CC	CG	GG	CT	GT
DNA	Control	CC	TT	CT	GG	AA	TT	GT
DNA	Control	TT	CC	CC	CC	GG	CC	GG
DNA	Control	TT	CC	CC	GG	GG	TT	GT
DNA	Control	TT	CT	CC	CC	AG	CC	GG
DNA	Control	CT	CT	CC	CG	AG	CT	GG
DNA	Control	CT	CT	CC	CG	AG	CT	GG
DNA	Control	CT	CT	CT	CG	AG	CT	GT
DNA	Control	CT	CT	CT	CG	AG	CT	GT
DNA	Control	CC	TT	TT	GG	AA	TT	TT
DNA	Control	CT	TT	CT	CG	AA	CT	GT
DNA	Control	CT	TT	CT	CG	AA	CT	GG
DNA	Control	CT	CC	CC	CG	GG	CT	GT
DNA	Control	CT	CC	CC	CG	GG	CT	GT
DNA	Control	CT	CT	CT	CG	AG	CT	GT
DNA	Control	TT	CC	CC	CC	GG	CC	GG
DNA	Control	CT	CT	CT	CG	AG	CT	GT
DNA	Control	CC	TT	CT	GG	AA	TT	GT
DNA	Control	TT	CC	CC	CG	GG	CC	GG
DNA	Control	CT	CT	CC	CG	AG	CT	GG
DNA	Control	TT	CC	CT	CG	GG	CC	GG
DNA	Control	TT	CC	CC	CG	GG	CC	GG
DNA	Control	TT	CT	CT	CG	AG	CT	GG
DNA	Control	CT	CT	CC	GG	AG	TT	GT
DNA	Control	CT	CT	CT	GG	AG	TT	GT
DNA	Control	CC	TT	CT	GG	AA	TT	GT
DNA	Control	CT	CT	CT	CG	AG	CT	GT
DNA	Control	CC	TT	CT	GG	AA	TT	TT
DNA	Control	CT	CC	CC	CG	GG	CT	GG
DNA	Control	TT	CC	CC	CC	GG	CC	GT
DNA	Control	TT	CC	CC	CC	GG	CC	GG
DNA	Control	CT	CT	CT	CG	AG	CT	GT
DNA	Control	TT	CC	CC	CG	GG	CC	GG
DNA	Control	TT	CC	CC	CG	GG	CT	GG
DNA	Control	TT	CC	CC	CG	GG	CT	GG
DNA	Control	CT	CC	CC	GG	GG	TT	GG
DNA	Control	TT	CT	CT	CC	AG	CC	GG
DNA	Control	CT	CT	CC	GG	AG	TT	GT
DNA	Control	CC	TT	TT	GG	AA	TT	TT
DNA	Control	CT	CC	CC	CG	GG	CT	GT
DNA	Control	CT	CC	CT	CG	GG	CT	GG
DNA	Control	TT	CC	CC	CC	GG	CC	GG
DNA	Control	CC	TT	CT	GG	AA	TT	TT
DNA	Control	TT	CC	CC	CC	GG	CC	GG
DNA	Control	TT	CC	CT	CC	GG	CC	GG
DNA	Control	TT	CC	CC	CC	GG	CC	GG
DNA	Control	CT	CT	CT	CG	AG	CT	GG
DNA	Control	TT	CC	CC	CG	GG	CC	GG
DNA	Control	TT	CC	CC	CG	GG	CT	GG
DNA	Control	TT	CC	CC	GG	GG	TT	GG
DNA	Control	CC	TT	CC	GG	AA	TT	GG
DNA	Control	CC	TT	CT	GG	AA	TT	GT
DNA	Control	CT	CT	CT	GG	AG	TT	GT
DNA	Control	CT	CT	CC	CG	AG	CT	GG
DNA	Control	CT	TT	CC	CG	AA	CT	GG
DNA	Control	CT	CT	CC	CG	AG	CT	GG
DNA	Control	CT	CC	CC	CG	GG	CT	GT
DNA	Control	TT	CC	CC	CC	GG	CC	GG
DNA	Control	TT	CC	CC	CG	GG	CC	GG
DNA	Control	CT	CT	CT	CG	AG	CT	GT
DNA	Control	CT	CT	CT	CG	AG	CT	GT
DNA	Control	CT	CC	CC	CG	GG	CT	GT
DNA	Control	CT	CC	CC	CG	GG	CT	GT
DNA	Control	TT	CT	CT	CG	AG	CC	GG
DNA	Control	TT	CC	CC	CC	GG	CC	GG
DNA	Control	CC	TT	CT	GG	AA	TT	GT
DNA	Control	TT	CC	CC	CG	GG	CC	GG
DNA	Control	CC	TT	CC	GG	AA	TT	GT
DNA	Control	CC	TT	TT	GG	AA	TT	GT
DNA	Control	CT	CT	CC	CG	AG	CT	GT
DNA	Control	TT	CC	CC	GG	GG	CC	GG
DNA	Control	TT	CC	CC	CC	GG	CC	GG
DNA	Control	CT	CT	CT	GG	AG	TT	GT
DNA	Control	CT	CT	CC	GG	AG	TT	GG
DNA	Control	CT	CT	CC	GG	AG	TT	GG
DNA	Control	TT	CC	CC	CC	GG	CC	GG
DNA	Control	TT	CC	CC	CG	GG	CT	GG
DNA	Control	CC	CT	CC	GG	AG	TT	GT
DNA	Control	TT	CT	CC	CG	AG	CC	GG
DNA	Control	CT	CT	CC	GG	AG	TT	GG
DNA	Control	CC	TT	CT	GG	AA	TT	GT
DNA	Control	CT	CT	CT	CG	AG	CT	GT
DNA	Control	CC	TT	CT	GG	AA	TT	TT
DNA	Control	TT	CC	CC	CC	GG	CC	GG
DNA	Control	CT	CT	CC	CG	AG	CT	GG
DNA	Control	CC	TT	CT	GG	AA	TT	TT
DNA	Control	TT	CC	CC	CC	GG	CC	GG
DNA	Control	TT	CT	CC	CC	AG	CC	GG
DNA	Control	TT	CC	CC	CC	GG	CC	GG
DNA	Control	TT	CC	CC	CC	GG	CC	GG
DNA	Control	CT	CT	CT	CG	AG	CT	GG
DNA	Control	CT	CT	CT	GG	AG	TT	GT
DNA	Control	CT	CT	CC	CG	AG	CT	GT
DNA	Control	TT	CC	CC	CC	GG	CC	GG
DNA	Control	TT	CC	CC	CC	GG	CC	GG
DNA	Control	CT	TT	CT	CG	AA	CT	GT
DNA	Control	TT	CC	CC	CG	GG	CT	GG
DNA	Control	TT	CC	CC	CC	GG	CC	GG
DNA	Control	TT	CT	CC	CG	AG	CC	GG
DNA	Control	TT	CC	CT	CC	GG	CC	GG
DNA	Control	TT	CC	CC	CC	GG	CC	GG
DNA	Control	CT	CT	CT	GG	AG	TT	GT
DNA	Control	TT	CT	CT	CC	AG	CC	GG
DNA	Control	CC	CT	CC	GG	AG	TT	GT
DNA	Control	CT	CT	CT	CG	AG	CT	GT
DNA	Ischemic Stroke	CT	CT	CC	CG	AG	CT	GT
DNA	Ischemic Stroke	CC	TT	CC	GG	AA	TT	GT
DNA	Ischemic Stroke	CC	CT	CT	GG	AG	TT	GT
DNA	Ischemic Stroke	CT	CT	CC	CG	AG	CT	GG
DNA	Ischemic Stroke	CT	CT	CC	CG	AG	CT	GT
DNA	Ischemic Stroke	TT	CC	CC	CG	GG	CC	GG
DNA	Ischemic Stroke	CC	CT	CC	GG	AG	TT	GT
DNA	Ischemic Stroke	CC	TT	CT	GG	AA	TT	TT
DNA	Ischemic Stroke	CT	CT	CT	CG	AG	CT	GT
DNA	Ischemic Stroke	TT	CC	CC	CC	GG	CC	GG
DNA	Ischemic Stroke	TT	CC	CC	CC	GG	CC	GG
DNA	Ischemic Stroke	CC	TT	CT	GG	AA	TT	GT
DNA	Ischemic Stroke	CC	CT	CT	GG	AG	TT	TT
DNA	Ischemic Stroke	CT	CT	CC	CG	AG	CT	GG
DNA	Ischemic Stroke	CT	CC	CC	CG	GG	CT	GG
DNA	Ischemic Stroke	TT	CT	CT	CC	AG	CC	GG
DNA	Ischemic Stroke	TT	CC	CT	CC	GG	CC	GG
DNA	Ischemic Stroke	TT	CC	CC	CG	GG	CC	GG
DNA	Ischemic Stroke	CT	CT	CC	CG	AG	CT	GG
DNA	Ischemic Stroke	CT	CT	CT	CG	AG	CT	GT
DNA	Ischemic Stroke	CT	CT	CT	CG	AG	CT	GT
DNA	Ischemic Stroke	TT	CC	CC	CC	GG	CC	GG
DNA	Ischemic Stroke	CT	CT	CT	CG	AG	CT	GT
DNA	Ischemic Stroke	CT	CT	CT	CG	AG	CT	GG
DNA	Ischemic Stroke	CT	CT	CC	CG	AG	CT	GG
DNA	Ischemic Stroke	CT	CT	CC	CG	AG	CT	GT
DNA	Ischemic Stroke	TT	CC	CC	CG	GG	CC	GG
DNA	Ischemic Stroke	CT	CT	CT	CG	AG	CT	GT
DNA	Ischemic Stroke	CT	CT	CT	CG	AG	CT	GG
DNA	Ischemic Stroke	TT	CC	CC	CC	GG	CC	GG
DNA	Ischemic Stroke	TT	CC	CC	GG	GG	CT	GG
DNA	Ischemic Stroke	TT	CC	CC	CC	GG	CC	GG
DNA	Ischemic Stroke	CC	TT	CT	GG	AA	TT	TT
DNA	Ischemic Stroke	CT	CT	CC	CG	AG	CT	GG
DNA	Ischemic Stroke	CT	CT	CC	CG	AG	CT	GG
DNA	Ischemic Stroke	CT	TT	CT	CG	AA	CT	GT
DNA	Ischemic Stroke	TT	CC	CC	CC	GG	CC	GG
DNA	Ischemic Stroke	TT	CC	CT	CC	GG	CC	GG
DNA	Ischemic Stroke	TT	CC	CC	CC	GG	CC	GG
DNA	Ischemic Stroke	TT	CC	CC	CC	GG	CC	GG
DNA	Ischemic Stroke	CT	CT	CC	CG	AG	CT	GG
DNA	Ischemic Stroke	CT	CT	CT	CG	AG	CT	GT
DNA	Ischemic Stroke	CC	TT	CT	GG	AA	TT	TT
DNA	Ischemic Stroke	TT	CC	CC	CC	GG	CC	GG
DNA	Ischemic Stroke	CT	CT	CC	CG	AG	CT	GT
DNA	Ischemic Stroke	CT	CT	CT	GG	AG	TT	GT
DNA	Ischemic Stroke	CC	TT	CC	GG	AA	TT	GT
DNA	Ischemic Stroke	TT	CC	CC	CC	GG	CC	GG
DNA	Ischemic Stroke	CT	CT	CT	CG	AG	CT	GT
DNA	Ischemic Stroke	CT	CT	CT	CG	AG	CT	GT
DNA	Ischemic Stroke	TT	CC	CC	CC	GG	CC	GG
DNA	Ischemic Stroke	CC	CT	CT	GG	AG	TT	GG
DNA	Ischemic Stroke	CT	CT	CC	CG	AG	CT	GG
DNA	Ischemic Stroke	TT	CC	CC	CC	GG	CC	GG
DNA	Ischemic Stroke	CC	TT	CT	GG	AA	TT	GT
DNA	Ischemic Stroke	CT	CT	CT	CG	AG	CT	GT
DNA	Ischemic Stroke	CT	CT	CT	CG	AG	CT	GT
DNA	Ischemic Stroke	CT	CT	CC	CG	AG	CT	GT
DNA	Ischemic Stroke	CT	CT	CC	CG	AG	CT	GT
DNA	Ischemic Stroke	TT	CC	CC	CC	GG	CC	GG
DNA	Ischemic Stroke	CC	TT	CT	GG	AA	TT	TT
DNA	Ischemic Stroke	CT	CT	CT	CG	AG	CT	GT
DNA	Ischemic Stroke	CT	CT	CT	CG	AG	CT	GG
DNA	Ischemic Stroke	TT	CC	CC	CC	GG	CC	GG
DNA	Ischemic Stroke	TT	CC	CC	CC	GG	CC	GG
DNA	Ischemic Stroke	CC	TT	TT	GG	GG	TT	TT
DNA	Ischemic Stroke	TT	CC	CT	CC	GG	CC	GG
DNA	Ischemic Stroke	CT	CT	CT	CG	AG	CT	GT
DNA	Ischemic Stroke	TT	CC	CC	CG	GG	CT	GG
DNA	Ischemic Stroke	CT	TT	CT	CG	AA	CT	GT
DNA	Ischemic Stroke	TT	CC	CC	GG	GG	TT	GG
DNA	Ischemic Stroke	CT	CT	CT	CG	AG	CT	GT
DNA	Ischemic Stroke	TT	CT	CT	CG	AG	CC	GG
DNA	Ischemic Stroke	TT	CC	CC	CC	GG	CC	GG
DNA	Ischemic Stroke	CT	CT	CT	CG	AG	CT	GG
DNA	Ischemic Stroke	TT	CC	CC	CC	GG	CC	GG
DNA	Ischemic Stroke	CT	CT	CC	CG	AG	CT	GG
DNA	Ischemic Stroke	CT	CT	CT	CG	AG	CT	GT
DNA	Ischemic Stroke	TT	CC	CC	CC	GG	CC	GG
DNA	Ischemic Stroke	CC	CT	CC	GG	AG	TT	GG
DNA	Ischemic Stroke	CT	CT	CT	CG	AG	CT	GT
DNA	Ischemic Stroke	CT	CT	CC	CG	AG	CT	GT
DNA	Ischemic Stroke	TT	CC	CC	CC	GG	CC	GG
DNA	Ischemic Stroke	CT	CT	CT	CG	AG	CT	GT
DNA	Ischemic Stroke	CT	CC	CC	CG	GG	CT	GT
DNA	Ischemic Stroke	TT	CC	CC	CG	GG	CC	GG
DNA	Ischemic Stroke	TT	CC	CC	CC	GG	CC	GG
DNA	Ischemic Stroke	CT	CT	CC	CG	AG	CT	GG
DNA	Ischemic Stroke	TT	CC	CC	CG	GG	CT	GG
DNA	Ischemic Stroke	CT	CT	CT	CG	AG	CT	GT
DNA	Ischemic Stroke	TT	CT	CT	CG	AG	CT	GG
DNA	Ischemic Stroke	TT	CC	CC	CC	GG	CC	GG
DNA	Ischemic Stroke	TT	CC	CC	CC	GG	CC	GG
DNA	Ischemic Stroke	CT	CT	CC	GG	AG	TT	GT
DNA	Ischemic Stroke	TT	CC	CC	CG	GG	CC	GG
DNA	Ischemic Stroke	TT	CC	CC	GG	GG	CT	GG
DNA	Ischemic Stroke	CT	CT	CC	CG	AG	CT	GT
DNA	Ischemic Stroke	CT	CC	CC	CG	GG	CT	GG
DNA	Ischemic Stroke	TT	CC	CC	GG	GG	CT	GG
DNA	Ischemic Stroke	TT	CC	CC	CC	GG	CC	GG
DNA	Ischemic Stroke	TT	CC	CC	CC	GG	CC	GG
DNA	Ischemic Stroke	CT	CT	CC	CG	AG	CT	GT
DNA	Ischemic Stroke	CT	CT	CT	CG	AG	CT	GT
DNA	Ischemic Stroke	CC	TT	CT	GG	AA	TT	GG
DNA	Ischemic Stroke	CT	CT	CT	CG	AG	CT	GT
DNA	Ischemic Stroke	CT	CT	CC	CG	AG	CT	GG
DNA	Ischemic Stroke	CT	CT	CT	CG	AG	CT	GT
DNA	Ischemic Stroke	CT	CT	CT	GG	AG	TT	GT
DNA	Ischemic Stroke	CC	TT	TT	GG	AA	TT	GT
DNA	Ischemic Stroke	TT	CC	CC	CC	GG	CC	GG
DNA	Ischemic Stroke	TT	CC	CC	GG	GG	TT	GG
DNA	Ischemic Stroke	CT	CT	CC	CG	AG	CT	GG
DNA	Ischemic Stroke	CT	CT	CT	CG	AG	CT	GT
DNA	Ischemic Stroke	CT	CT	CC	GG	AG	TT	GG
DNA	Ischemic Stroke	TT	CC	CC	CC	GG	CC	GG
DNA	Ischemic Stroke	TT	CC	CC	CC	GG	CC	GG
DNA	Ischemic Stroke	TT	CC	CC	CG	GG	CC	GG
DNA	Ischemic Stroke	TT	CC	CC	CC	GG	CC	GG
DNA	Ischemic Stroke	CT	CT	CT	CG	AG	CT	GT
DNA	Ischemic Stroke	CT	CT	CC	CG	AG	CT	GT
DNA	Ischemic Stroke	CT	CT	CT	CG	AG	CT	GT
DNA	Ischemic Stroke	CT	CT	CC	CG	AG	CT	GG
DNA	Ischemic Stroke	CC	TT	CC	GG	AA	TT	GG
DNA	Ischemic Stroke	CT	CC	CC	GG	GG	TT	GT
DNA	Ischemic Stroke	CT	CT	CT	CG	AG	CT	GT
DNA	Ischemic Stroke	TT	CC	CC	CC	GG	CC	GG
DNA	Ischemic Stroke	CT	CC	CC	CG	GG	CT	GT
DNA	Ischemic Stroke	TT	CC	CC	CC	GG	CC	GG
DNA	Ischemic Stroke	TT	CC	CC	CG	GG	CC	GG
DNA	Ischemic Stroke	TT	CC	CC	CG	GG	CC	GG
DNA	Ischemic Stroke	TT	CC	CC	CC	GG	CC	GG
DNA	Ischemic Stroke	CC	TT	TT	GG	AA	TT	TT
DNA	Ischemic Stroke	CT	CC	CC	CG	GG	CT	GT
DNA	Ischemic Stroke	CT	TT	CT	CG	AA	CT	GT
DNA	Ischemic Stroke	CT	CT	CC	CG	AG	CT	GT
DNA	Ischemic Stroke	CT	CT	CC	CG	AG	CT	GT
DNA	Ischemic Stroke	CT	CC	CC	CG	GG	CT	GT
DNA	Ischemic Stroke	TT	CT	CT	CC	AG	CC	GG
DNA	Ischemic Stroke	TT	CC	CC	CG	GG	CC	GG
DNA	Ischemic Stroke	TT	CT	CT	CC	AG	CC	GG
DNA	Ischemic Stroke	TT	CC	CC	GG	GG	TT	GG
DNA	Ischemic Stroke	CT	CT	CT	CG	AG	CT	GT
DNA	Ischemic Stroke	CC	TT	TT	GG	AA	TT	GG
DNA	Ischemic Stroke	CT	CT	CT	GG	AG	TT	GT
DNA	Ischemic Stroke	CT	CT	CT	CG	AG	CT	GT
DNA	Ischemic Stroke	CT	CT	CT	CG	AG	CT	GT
DNA	Ischemic Stroke	CT	CT	CC	CG	AG	CT	GG
DNA	Ischemic Stroke	CT	CT	CT	CG	AG	CT	GT
DNA	Ischemic Stroke	TT	CC	CC	CG	GG	CC	GG
DNA	Ischemic Stroke	CT	CT	CT	CG	AG	CT	GT
DNA	Ischemic Stroke	CT	CT	CC	CG	AG	CT	GG
DNA	Ischemic Stroke	CT	CC	CC	CG	GG	CT	GG
DNA	Ischemic Stroke	TT	CC	CC	CC	GG	CC	GG
DNA	Ischemic Stroke	TT	CC	CC	CG	GG	CC	GG
DNA	Ischemic Stroke	CT	CT	CT	CG	AG	CT	GT
DNA	Ischemic Stroke	TT	CC	CC	CC	GG	CC	GG
DNA	Ischemic Stroke	TT	CC	CC	CC	GG	CC	GG
DNA	Ischemic Stroke	TT	CC	CT	CC	GG	CC	GG
DNA	Ischemic Stroke	CT	CC	CC	CG	GG	CT	GT
